# Supplementary material for: Intramolecular hydrogen bond – enhanced electroluminescence performance of hybridized local and charge transfer (HLCT) excited-state blue-emissive materials
Source: Royal Society of Chemistry journal article supplement (doi:10.1039/d0tc04590j), 2020-11-05
Supplement: d0tc04590j1.pdf [file d0tc04590j1.pdf]

## Supporting Information

### Intramolecular hydrogen bond-enhanced electroluminescent performance of hybridized local and charge transfer (HLCT) excited state blue emissive materials

Wan Li,<sup>a</sup> Pongsakorn Chasing,<sup>a</sup> Wachara Benchaphanthawee,<sup>b</sup> Thanyarat Chawanpunyawat,<sup>a</sup> Chokchai Kaiyasuan,<sup>a</sup> Phattananawee Nalaoh,<sup>a</sup> Nawe Kungwan,<sup>b</sup> Supawadee Namuangruk,<sup>c</sup> Taweesak Sudyoadsuk<sup>a</sup> and Vinich Promarak<sup>\*ad</sup>

<sup>a</sup> Department of Materials Science and Engineering, School of Molecular Science and Engineering, Vidyasirimedhi Institute of Science and Technology, Wangchan, Rayong 21210, Thailand. E-mail: [vinich.p@vistec.ac.th](mailto:vinich.p@vistec.ac.th)

<sup>b</sup> Department of Chemistry, Faculty of Science, Chiang Mai University, Amphur Muang, Chiang Mai 50200, Thailand.

<sup>c</sup> National Nanotechnology Center (NANOTEC), National Science and Technology Development Agency, Pathum Thani 12120, Thailand

<sup>d</sup> Research Network of NANOTEC-VISTEC on Nanotechnology for Energy, Vidyasirimedhi Institute of Science and Technology, Wangchan, Rayong 21210, Thailand.

#### Material Synthesis and Characterizations:

**9,10-Dibromoanthracene (1):** A solution of Br<sub>2</sub> (2.90 mL, 56.60 mmol) in CHCl<sub>3</sub> (50 mL) was added dropwise into the solution of anthracene (5.0 g, 28.05 mmol) in CHCl<sub>3</sub> (100 mL) at room temperature. The mixture was stirred for 4 h, then the solvent was removed, and the crude product was purified by recrystallization in dichloromethane to obtain yellow needle-like crystal of 9.4 g (74 %). <sup>1</sup>H NMR (600 MHz, CDCl<sub>3</sub>) δ 8.62 – 8.57 (m, 1H), 7.66 – 7.61 (m, 4H). <sup>13</sup>C NMR (151 MHz, CDCl<sub>3</sub>) δ 131.10, 128.30, 127.47, 123.54. Formula: C<sub>14</sub>H<sub>8</sub>Br<sub>2</sub>, Mol. Wt: 336.03 Da, MS (APCI): m/z: 335.96 [M<sup>+</sup>].

**4-(10-Bromoanthracene-9-yl)-N,N-diphenylaniline (2):** A mixture of **1** (3.85 g, 11.53 mmol), 4-(diphenylamino)phenylboronic acid (667 mg, 2.31 mmol), Pd(PPh<sub>3</sub>)<sub>4</sub> (57.78 mg, 0.05 mmol), 2M sodium carbonate (2.45 g, 23.10 mmol) aqueous solution and anhydrous THF was degassed with nitrogen for 15 min while stirring. Then the stirring reaction was heated and refluxed under nitrogen atmosphere for 48 h. The mixture was cooled to room temperature after confirming consumption of the starting materials by TLC in 10% v/v dichloromethane-hexane. Then the mixture was added to brine (20 ml) and extracted with a certain amount of dichloromethane. The extract was concentrated under reduce pressure and finally purified by silica gel column chromatography of 896 mg (78%). <sup>1</sup>H NMR (600 MHz, CDCl<sub>3</sub>) δ 8.61 (d, J = 8.4 Hz, 1H), 7.81 (d, J = 9 Hz, 1H), 7.60 (t, J=7.8, 1H), 7.43 (t, J=7.8, 1H), 7.34 (t, J = 7.8 Hz, 2H), 7.28-7.24 (m, 4H), 7.09 (t, J = 7.2 Hz, 1H). <sup>13</sup>C NMR (151 MHz, CDCl<sub>3</sub>) δ 147.72, 147.44, 137.74, 131.95, 131.76, 131.27, 130.32, 129.42, 127.87, 127.50, 126.93, 125.48, 124.80, 123.24, 122.85, 122.56. Formula: C<sub>32</sub>H<sub>22</sub>BrN, Mol. Wt: 500.44 Da, MS (APCI): m/z: 501.99 [M<sup>+</sup>].

**N,N-diphenyl-4-(10-(4,4,5,5-tetramethyl-1,3,2-dioxaborolan-2-yl)anthracen-9-yl)aniline (3):** **2** (500 mg, 1.00 mmol), bis(pinacolato)diboron (761.82 mg, 3.00 mmol), KOAc (1.18 g, 12.00 mmol), and Pd(dppf)<sub>2</sub>Cl<sub>2</sub>·CH<sub>2</sub>Cl<sub>2</sub> (40.83 mg, 0.05 mmol) were mixed followed by adding 30ml anhydrous Toluene. The mixture was degassed with nitrogen for 15 min while stirring. Then the stirring reaction was heated and refluxed under nitrogen atmosphere for 15 h. The mixture was cooled to room temperature after confirming consumption of the starting materials by TLC in 30% v/v dichloromethane-hexane. Then the mixture was added to brine (20 ml) and extracted with a certain amount of dichloromethane. The extract was concentrated under reduce pressure and finally purified

by silica gel column chromatography of 585 mg (65%).  $^1\text{H}$  NMR (600 MHz,  $\text{CDCl}_3$ )  $\delta$  8.43 (d,  $J = 9.0$  Hz, 1H), 7.79 (d,  $J = 8.4$  Hz, 1H), 7.47 (t,  $J = 7.8$  Hz, 1H), 7.37 (t,  $J = 7.8$  Hz, 1H), 7.33 (t,  $J = 7.8$  Hz, 2H), 7.07 (t,  $J = 7.2$  Hz, 1H), 1.60 (s, 6H).  $^{13}\text{C}$  NMR (151 MHz,  $\text{CDCl}_3$ )  $\delta$  147.83, 147.11, 139.46, 135.47, 132.80, 131.95, 129.93, 129.36, 128.44, 127.48, 125.40, 124.78, 124.62, 123.14, 123.03, 84.46, 25.23. Formula:  $\text{C}_{38}\text{H}_{34}\text{BrNO}_2$ , Mol. Wt: 547.51 Da, MS (APCI):  $m/z$ : 548.26 [M+].

**4-Bromo-2-(1-phenyl-1H-phenanthro[9,10-d]imidazol-2-yl)phenol (5):** 9,10-phenanthrenequinone (500 mg, 2.40 mmol) and 5-bromosalicylaldehyde (482.4 mg, 2.40 mmol) were mixed at room temperature followed by adding 30 ml of acetic acid. Aniline (335 mg, 3.60 mmol) was then added to this solution little by little, and ammonium acetate (924.96 mg, 12 mmol) was added subsequently. The mixture was heated at 110 °C for 12 h under nitrogen atmosphere and reflux device. After termination of reaction, the dark solution was poured into a copious amount of water in a 1000ml beaker. Then a certain amount of sodium hydrogen carbonate was added into the mixture until neutralizing. The crude product was purified by recrystallization in dichloromethane to obtain white solid power of 510 mg (45%).  $^1\text{H}$  NMR (600 MHz,  $\text{CDCl}_3$ )  $\delta$  13.92 (s, 1H), 8.78 (d,  $J = 7.8$  Hz, 1H), 8.70 (dd,  $J = 14.4, 8.4$  Hz, 2H), 7.86 – 7.81 (m, 1H), 7.81 – 7.75 (m, 3H), 7.69 (t,  $J = 7.8$  Hz, 1H), 7.63 (d,  $J = 7.8$  Hz, 2H), 7.54 (t,  $J = 7.8$  Hz, 1H), 7.28 (d,  $J = 8.4$  Hz, 2H), 7.14 (d,  $J = 8.4$  Hz, 1H), 7.01 (d,  $J = 8.4$  Hz, 1H), 6.74 (s, 1H).  $^{13}\text{C}$  NMR (151 MHz,  $\text{CDCl}_3$ )  $\delta$  158.28, 147.08, 138.62, 134.38, 133.22, 131.08, 130.94, 129.68, 128.88, 128.68, 128.56, 127.60, 127.16, 126.64, 126.25, 125.69, 125.55, 124.23, 123.27, 122.57, 122.50, 120.97, 119.71, 114.57, 109.73. Formula:  $\text{C}_{27}\text{H}_{17}\text{BrN}_2\text{O}$ , Mol. Wt: 465.35 Da, MS (APCI):  $m/z$ : 466.03 [M+].

**5-Bromo-2-(1-phenyl-1H-phenanthro[9,10-d]imidazol-2-yl)phenol (6):** The synthesis of **6** used the same conditions as **5** among which the 5-bromosalicylaldehyde was replaced by 4-bromosalicylaldehyde (482 mg, 2.40 mmol): **6** of 520 mg was obtained (51%).  $^1\text{H}$  NMR (600 MHz,  $\text{CDCl}_3$ )  $\delta$  14.12 (s, 1H), 8.77 (d,  $J = 8.4$  Hz, 1H), 8.69 (dd,  $J = 13.2, 8.4$  Hz, 2H), 7.83 – 7.72 (m, 4H), 7.69 (t,  $J = 7.8$  Hz, 1H), 7.62 (d,  $J = 7.2$  Hz, 2H), 7.53 (t,  $J = 7.8$  Hz, 1H), 7.31 (s, 1H), 7.28 – 7.24 (m, 1H), 7.05 (d,  $J = 8.4$  Hz, 1H), 6.64 (d,  $J = 8.4$  Hz, 1H), 6.54 (d,  $J = 9.0$  Hz, 1H).  $^{13}\text{C}$  NMR (151 MHz,  $\text{CDCl}_3$ )  $\delta$  160.10, 147.76, 138.80, 134.38, 131.03, 130.83, 129.62, 129.00, 128.54, 127.58, 127.14, 126.80, 126.61, 126.22, 125.66, 125.45, 124.23, 123.26, 122.57, 122.51, 121.31, 121.15, 120.89, 112.12. Formula:  $\text{C}_{27}\text{H}_{17}\text{BrN}_2\text{O}$ , Mol. Wt: 465.35 Da, MS (APCI):  $m/z$ : 466.13 [M+].

# Fig. S1 <sup>1</sup>H-NMR and <sup>13</sup>C-NMR spectra

## Compound 1:

BBO\_PROTON8 CDC13 (C:\VISTEC NMR Data\VP} vp 14

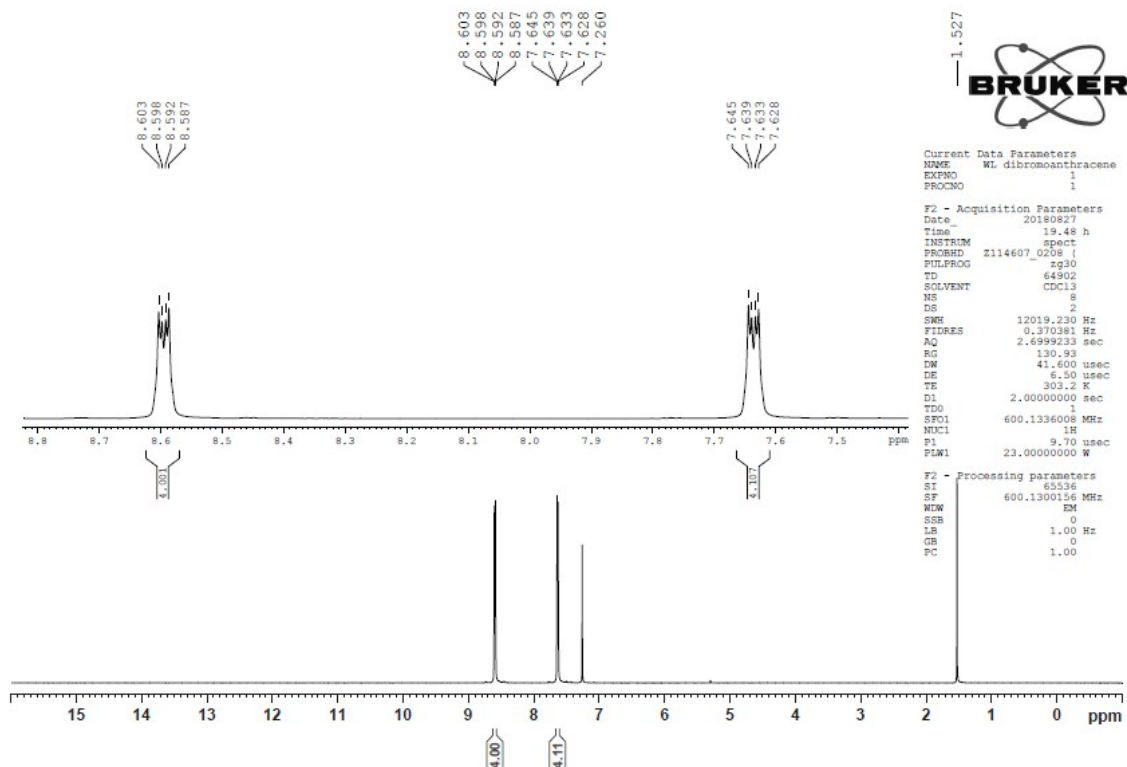

WL dibromoanthracene CDC13  
 BBO\_C13CPD256 CDC13 (C:\VISTEC NMR Data\VP} vp 14

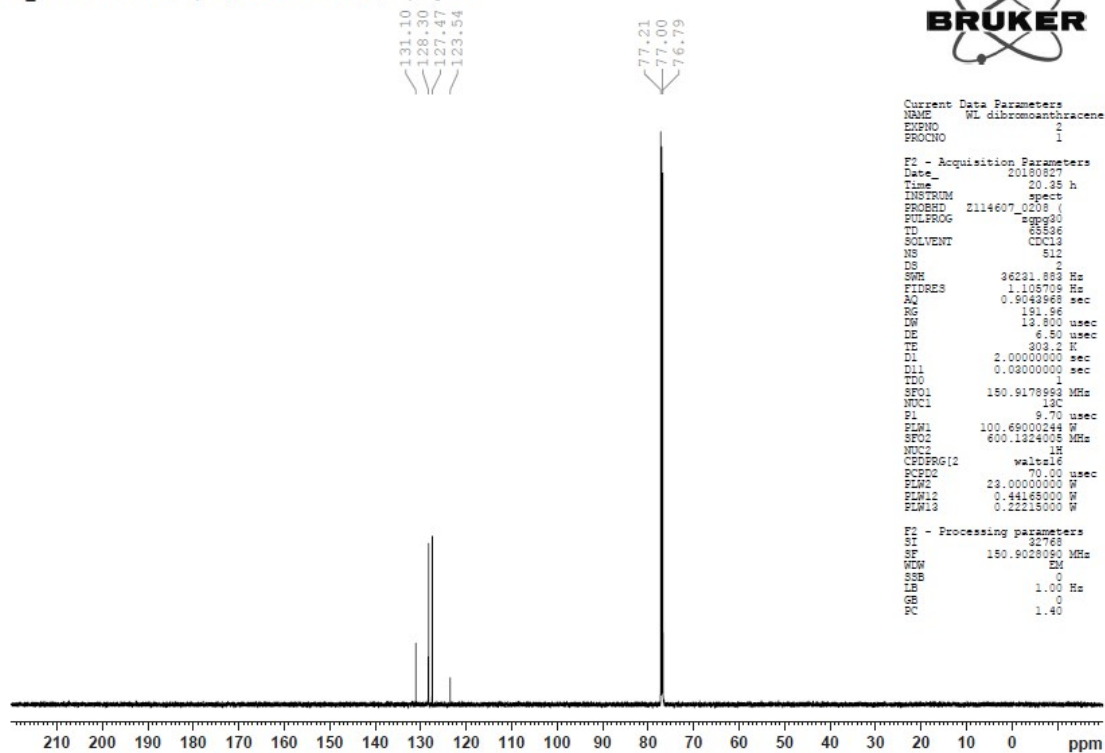

**Compound 2:**

BBO\_PROTON8 CDC13 (C:\VISTEC NMR Data\VP) vp 7

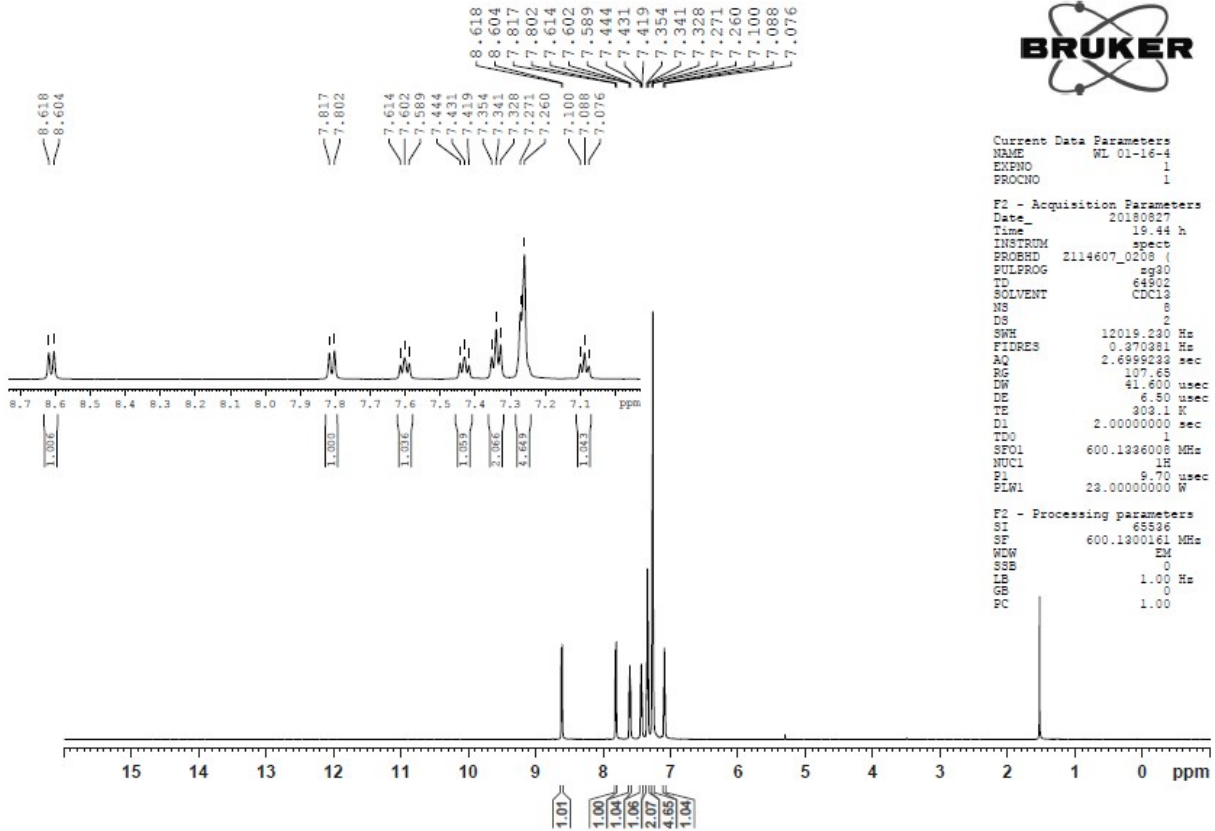

WL 01-16-4 CDCl3  
 BBO\_C13CPD256 CDCl3 (C:\VISTEC NMR Data\VP) vp 7

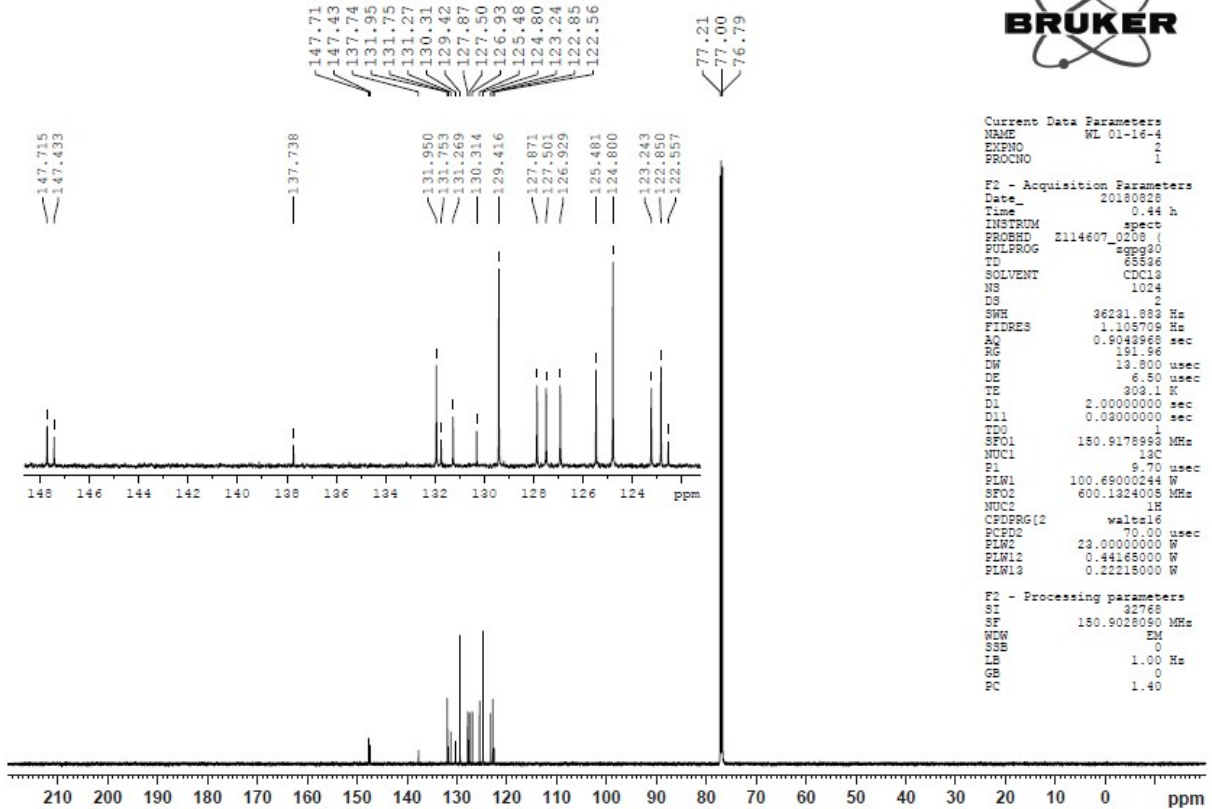

**Compound 3:**

WL 01-20 CDC13  
 BBO\_PROTON8 CDC13 {C:\VISTEC NMR Data\VP} vp 6

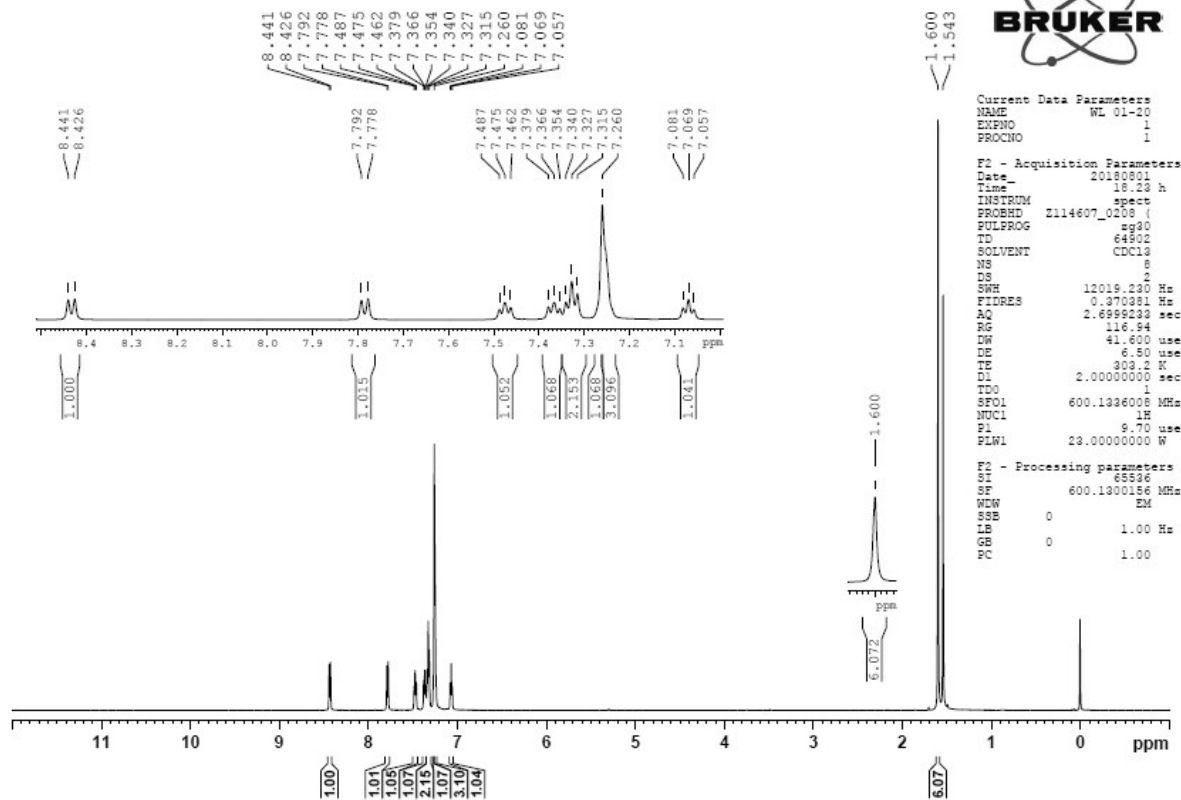

**BRUKER**

Current Data Parameters  
 NAME WL 01-20  
 EXPNO 1  
 PROCNO 1

F2 - Acquisition Parameters  
 Date\_ 20180801  
 Time 18:23 h  
 INSTRUM spect  
 PROBHD Z114607\_0208 (4  
 PULPROG zg30  
 TD 6492  
 SOLVENT CDCl3  
 NS 8  
 DS 2  
 SWH 12019.230 Hz  
 FIDRES 0.370381 Hz  
 AQ 2.6999233 sec  
 RG 116.94  
 DW 41.600 usec  
 DE 6.50 usec  
 TE 303.2 K  
 D1 2.00000000 sec  
 TDO 1  
 SFO1 600.1324005 MHz  
 NUC1 13C  
 P1 9.70 usec  
 PLW1 23.00000000 W

F2 - Processing parameters  
 SI 65536  
 SF 600.1300156 MHz  
 WDW EM  
 SSB 0  
 LB 1.00 Hz  
 GB 0  
 PC 1.00

WL 01-20 CDC13 13C 1024  
 BBO\_C13CPD256 CDC13 {C:\VISTEC NMR Data\VP} vp 6

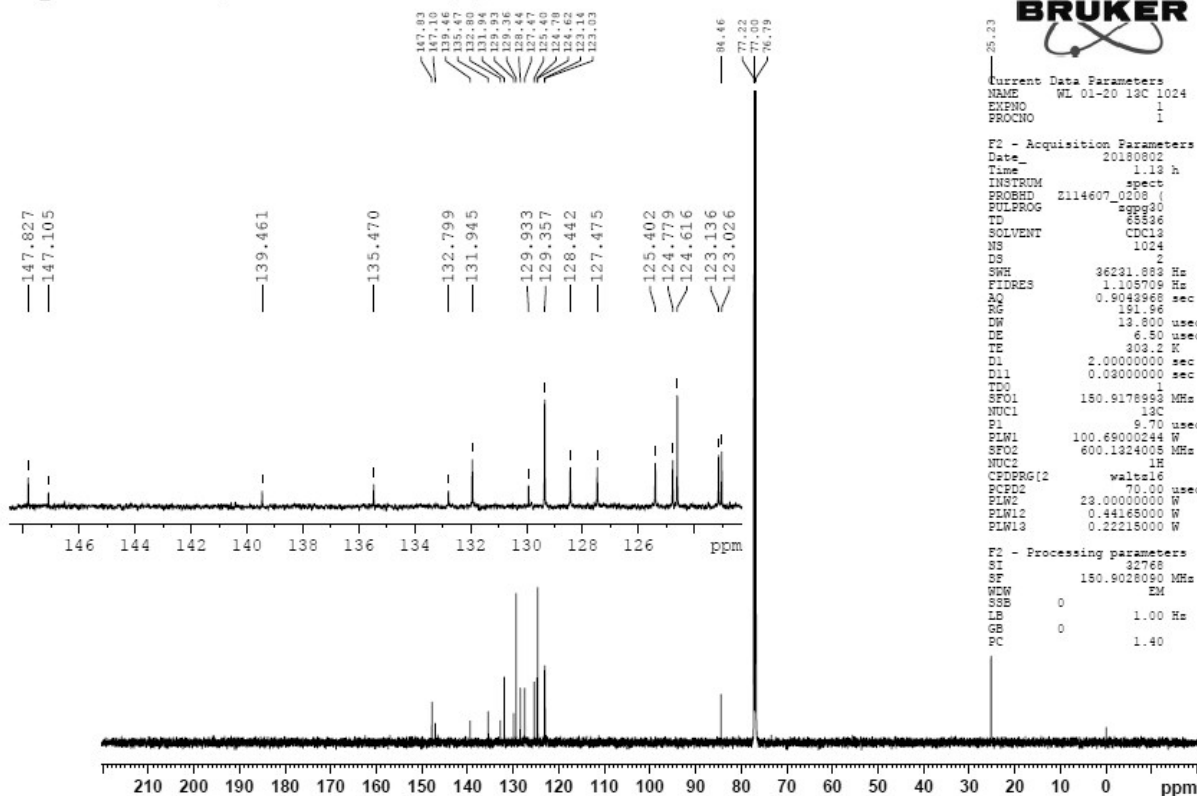

**BRUKER**

Current Data Parameters  
 NAME WL 01-20 13C 1024  
 EXPNO 1  
 PROCNO 1

F2 - Acquisition Parameters  
 Date\_ 20180802  
 Time 1:13 h  
 INSTRUM spect  
 PROBHD Z114607\_0208 (4  
 PULPROG zg30  
 TD 65536  
 SOLVENT CDCl3  
 NS 1024  
 DS 2  
 SWH 36231.883 Hz  
 FIDRES 1.108709 Hz  
 AQ 0.804296 sec  
 RG 191.96  
 DW 13.800 usec  
 DE 6.50 usec  
 TE 303.2 K  
 D1 2.00000000 sec  
 D11 0.03000000 sec  
 TDO 1  
 SFO1 150.9178993 MHz  
 NUC1 13C  
 P1 6.70 usec  
 PLW1 100.69000244 W  
 SFO2 600.1324005 MHz  
 NUC2 1H  
 CDPRG(2) waltz16  
 SFO3 70.00 usec  
 PLW2 23.00000000 W  
 PLW3 0.44165000 W  
 PLW4 0.22218000 W

F2 - Processing parameters  
 SI 32768  
 SF 150.9028090 MHz  
 WDW EM  
 SSB 0  
 LB 1.00 Hz  
 GB 0  
 PC 1.40

**Compound 5:**

WL 01-17 f1 CDC13 1H  
 BBO\_PROTON8 CDC13 (C:\VISTEC NMR Data\VP) vp 3

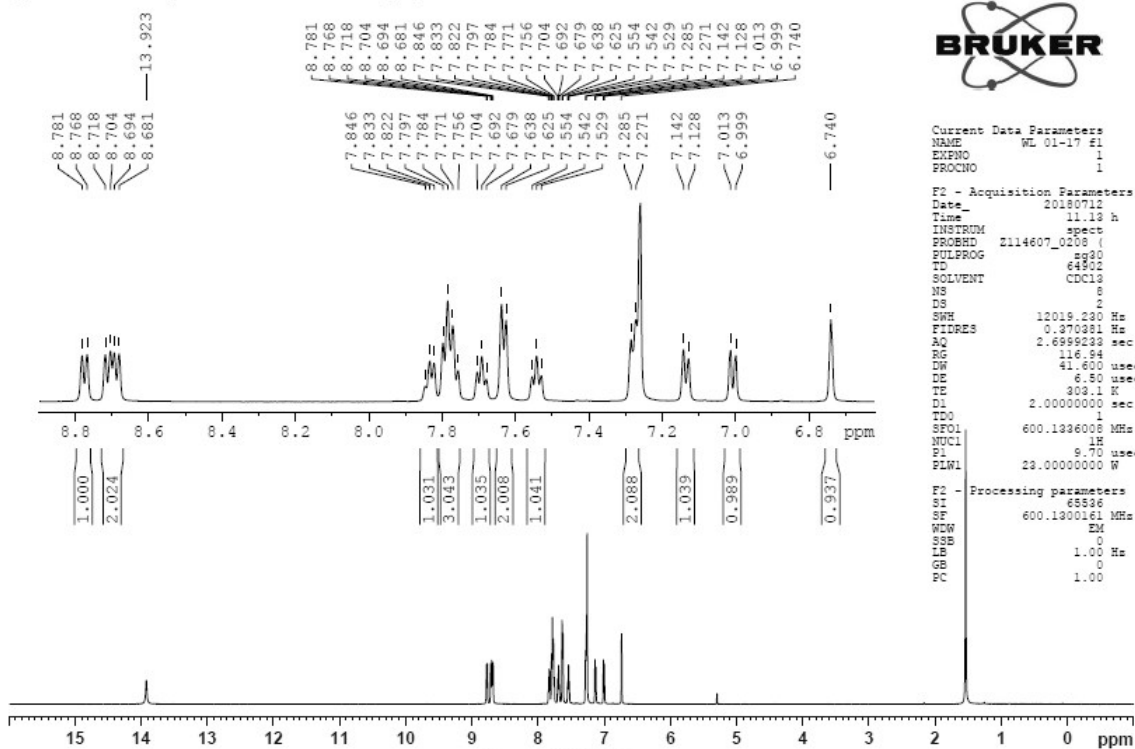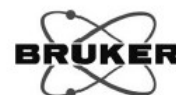

Current Data Parameters  
 NAME WL 01-17 f1  
 EXPNO 1  
 PROCNO 1

F2 - Acquisition Parameters  
 Date\_ 20180712  
 Time 11.13 h  
 INSTRUM spect  
 PROBHD Z114607\_0208 ( )  
 PULPROG zgpg30  
 TD 65536  
 SOLVENT CDC13  
 NS 2  
 DS 2  
 SWH 12019.230 Hz  
 FIDRES 0.370391 Hz  
 AQ 2.6895233 sec  
 RG 116.94  
 DW 41.600 usec  
 DE 6.50 usec  
 TE 303.1 K  
 D1 2.00000000 sec  
 TDO 1  
 SFOL 600.1324005 MHz  
 NUCL1 13C  
 P1 9.70 usec  
 PLW1 23.00000000 W

F2 - Processing parameters  
 SI 65536  
 SF 600.1324005 MHz  
 WDW EM  
 SSB 0  
 LB 1.00 Hz  
 GB 0  
 PC 1.00

WL 01-17 13C CDC13  
 BBO\_C13CPD256 CDC13 (C:\VISTEC NMR Data\VP) vp 2

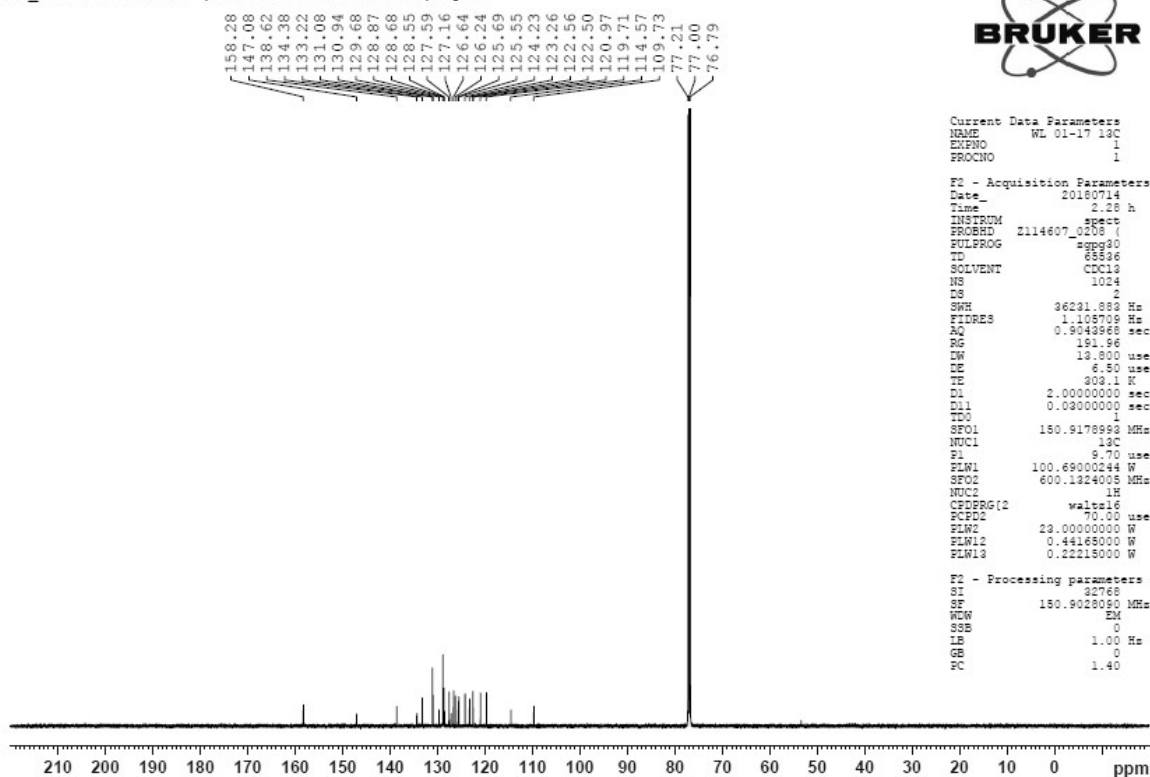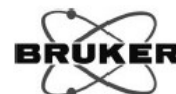

Current Data Parameters  
 NAME WL 01-17 13C  
 EXPNO 1  
 PROCNO 1

F2 - Acquisition Parameters  
 Date\_ 20180714  
 Time 2.28 h  
 INSTRUM spect  
 PROBHD Z114607\_0218 ( )  
 PULPROG zgpg30  
 TD 65536  
 SOLVENT CDC13  
 NS 1024  
 DS 2  
 SWH 36231.883 Hz  
 FIDRES 1.108709 Hz  
 AQ 0.904366 sec  
 RG 161.86  
 DW 13.800 usec  
 DE 6.50 usec  
 TE 303.1 K  
 D1 2.00000000 sec  
 D11 0.03000000 sec  
 TDO 1  
 SFOL 150.9178993 MHz  
 NUCL1 13C  
 P1 9.70 usec  
 PLW1 100.69000244 W  
 SF02 600.1324005 MHz  
 NUCC 1H  
 CDPORG[2] waltz16  
 PCPD2 70.00 usec  
 PLR2 23.00000000 W  
 PLR12 0.44165000 W  
 PLR13 0.22215000 W

F2 - Processing parameters  
 SI 32768  
 SF 150.9028050 MHz  
 WDW EM  
 SSB 0  
 LB 1.00 Hz  
 GB 0  
 PC 1.40



# Compound mTAHPI:

Q-ToF MS Report | Frontier Research Center@VISTEC

Analysis Info Acquisition Date 8/13/2018 2:06:48 PM  
 Analysis Name D:\Data\VISTEC Data QTOF\Vinich\Li Wan\WL 01-22 final frac1.d  
 Method APCI\_DirectProbe.m Operator VISTEC  
 Sample Name WL 01-22 final frac1 Instrument compact 8255754.20068  
 Comment m/z 805.3093

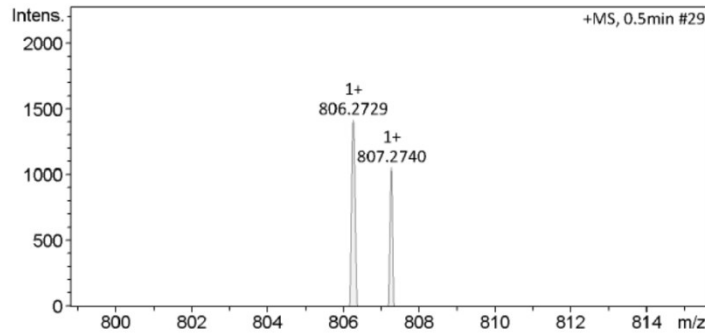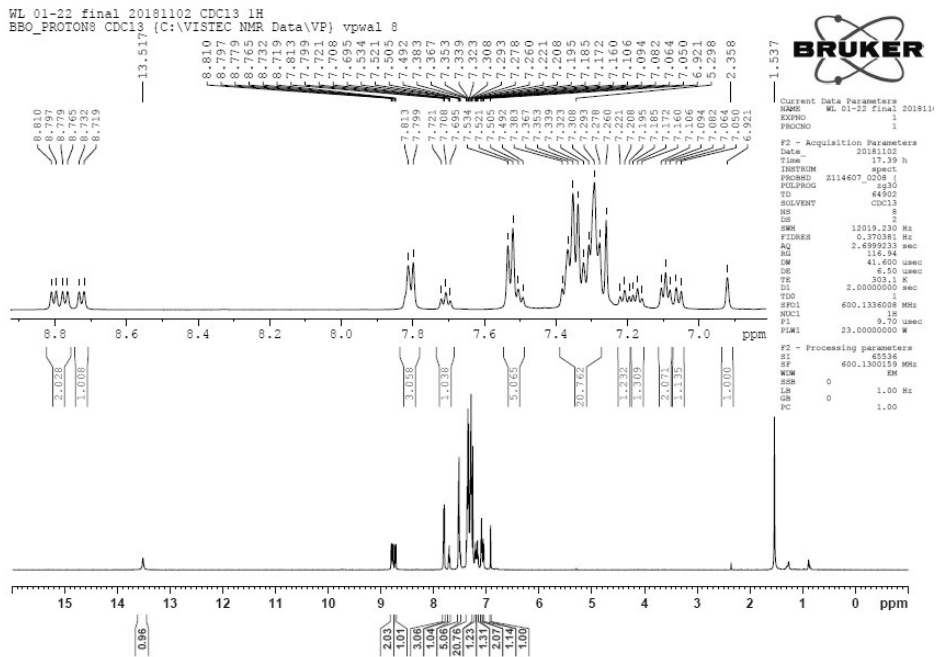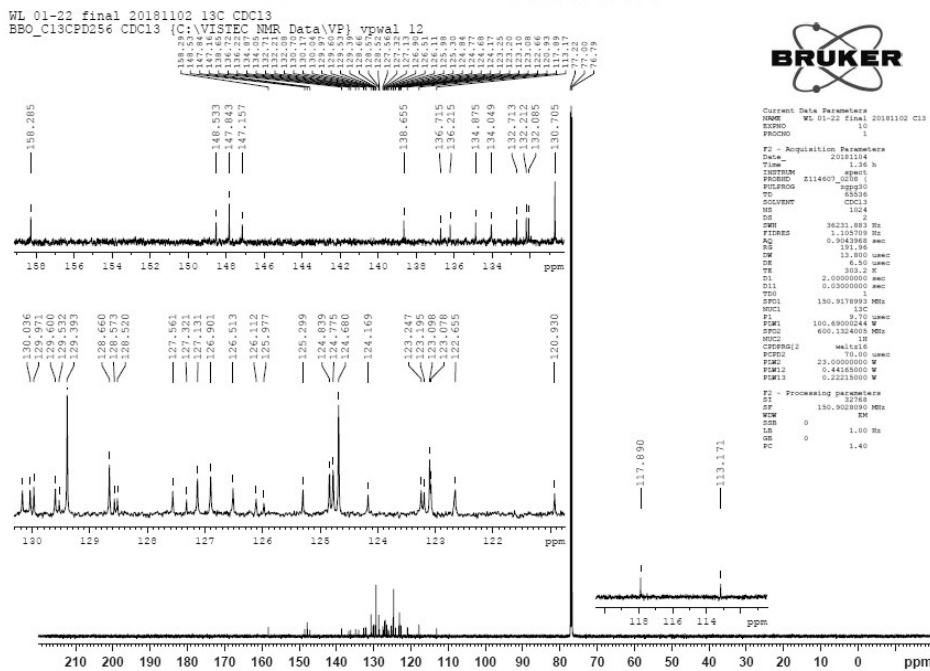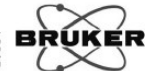

Current Data Parameters  
 Name WL 01-22 final 201811  
 EXPNO 1  
 PROCNO 1  
 F2 - Acquisition Parameters  
 Date\_ 20181102  
 Time 17:39 h  
 INSTRUM spect  
 PULPROG zpg30  
 TD 64902  
 SFO1 CDC13  
 NS 2  
 SSW 12019.230 Hz  
 FIDRES 0.370381 Hz  
 AQ 2.4399233 sec  
 RG 116.94  
 SW 41.600 usec  
 DE 6.50 usec  
 TE 303.1 K  
 D1 2.00000000 sec  
 TSD SPOL 600.1336008 MHz  
 HSI 18  
 FI 9.70 usec  
 FSI 23.00000000 W  
 F2 - Processing parameters  
 SI 6536  
 SF 600.1300159 MHz  
 DS 8H  
 ASB 0  
 GB 1.00 Hz  
 RB 1.00

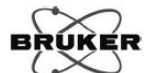

Current Data Parameters  
 Name WL 01-22 final 20181102 C13  
 EXPNO 10  
 PROCNO 1  
 F2 - Acquisition Parameters  
 Date\_ 20181104  
 Time 1:38 h  
 INSTRUM spect  
 PULPROG zgpg30  
 TD 65536  
 SFO1 CDC13  
 NS 1024  
 SSW 36231.883 Hz  
 FIDRES 0.330309 Hz  
 AQ 0.9043968 sec  
 RG 251.94  
 SW 13.890 usec  
 DE 6.30 usec  
 TE 303.2 K  
 D1 2.00000000 sec  
 TSD SPOL 130.9178993 MHz  
 HSI 18  
 FI 9.70 usec  
 FSI 100.6900240 W  
 F2 - Processing parameters  
 SI 52769  
 SF 130.9028090 MHz  
 DS 8H  
 ASB 0  
 GB 1.00 Hz  
 RB 1.40



# Compound pTAHPI:

Q-ToF MS Report | Frontier Research Center@VISTEC

Analysis Info: D:\Data\VISTEC Data QTOF\vrnich\LI Wan\WL 01-24 final.d Acquisition Date: 11/26/2018 8:08:58 PM  
 Method: APCI\_DirectProbe.m Operator: BDAL@DE  
 Sample Name: WL 01-24 final Instrument: compact 8255754.20088  
 Comment: 805.3093

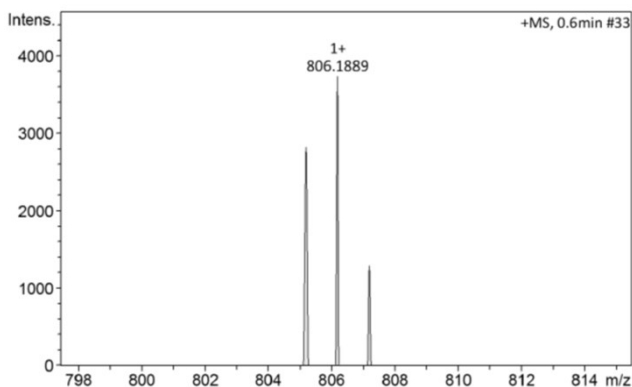

# Compound pTAPI:

Q-ToF MS Report | Frontier Research Center@VISTEC

|                            |                                                                |                                        |
|----------------------------|----------------------------------------------------------------|----------------------------------------|
| <b>Analysis Info</b>       | Analysis Name: D:\Data\VISTEC Data QTOF\VinichLi Wan\WL01-36.d | Acquisition Date: 8/30/2019 2:17:35 PM |
| Method: APCI_DirectProbe.m | Operator: VISTEC                                               | Instrument: compact 8255754.20068      |
| Sample Name: WL01-36       | Comment:                                                       |                                        |

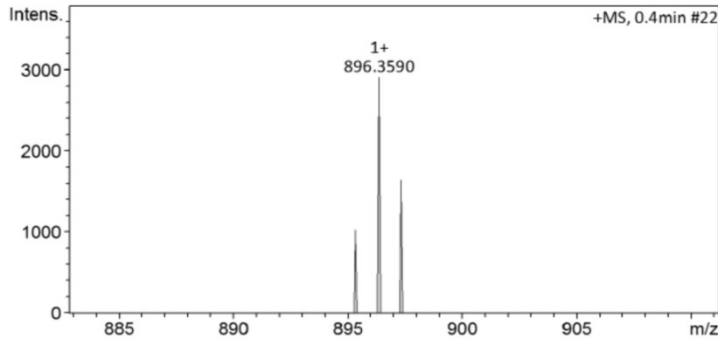

WL01\_36\_H CDCl3  
CP\_PROTONS CDCl3 (C:\VISTEC NMR Data\VP) vpwal 2

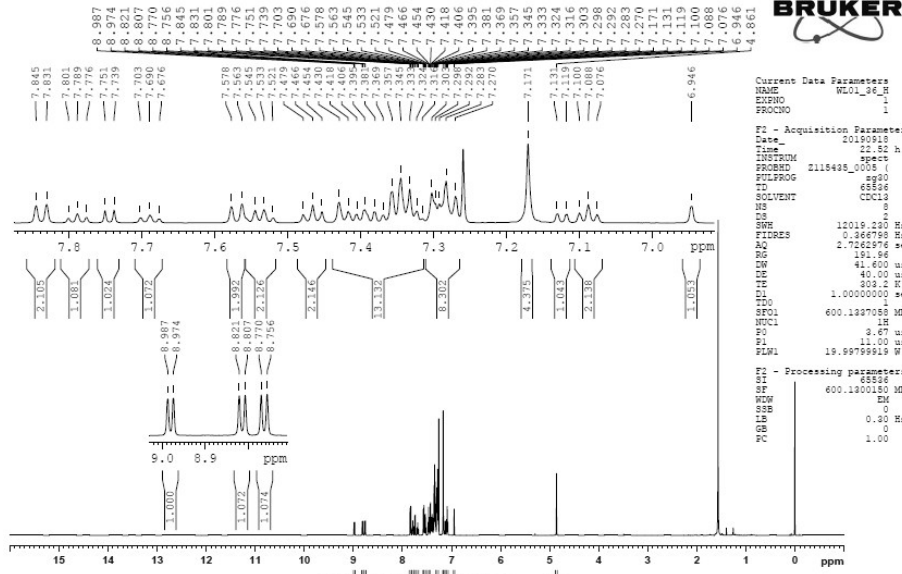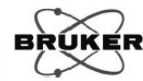

**Current Data Parameters**  
 Name: WL01\_36\_H  
 EXPNO: 1  
 PROCNO: 1  
 F2 - Acquisition Parameters  
 Date\_: 20190830  
 Time: 22:52 h  
 INSTRUM: spect  
 PROBRD: Z115495\_0005 ( )  
 PULPROG: zgpg30  
 TD: 65536  
 SFO1: 600.1327058 MHz  
 SFO2: 300.0663529 MHz  
 FIDRES: 12019.280 Hz  
 RES: 0.366738 Hz  
 AQ: 2.7926297 sec  
 RG: 191.56  
 DQ: 41.600 usec  
 DE: 40.000 usec  
 TEMPERATURE: 303.2 K  
 P1: 1.00000000 sec  
 SFO1: 600.1327058 MHz  
 SFO2: 300.0663529 MHz  
 F1: 3.07 usec  
 F2: 11.00 usec  
 SFO1: 19.99799919 W  
 F2 - Processing parameters  
 SF: 600.1300160 MHz  
 WHW: EM  
 SSB: 0  
 GAMMA: 0.30 Hz  
 PC: 1.00

WL01\_36\_C 1024 CDCl3  
CP\_C13CPD32\_DEI1 (C:\VISTEC NMR Data\VP) vpwal 2

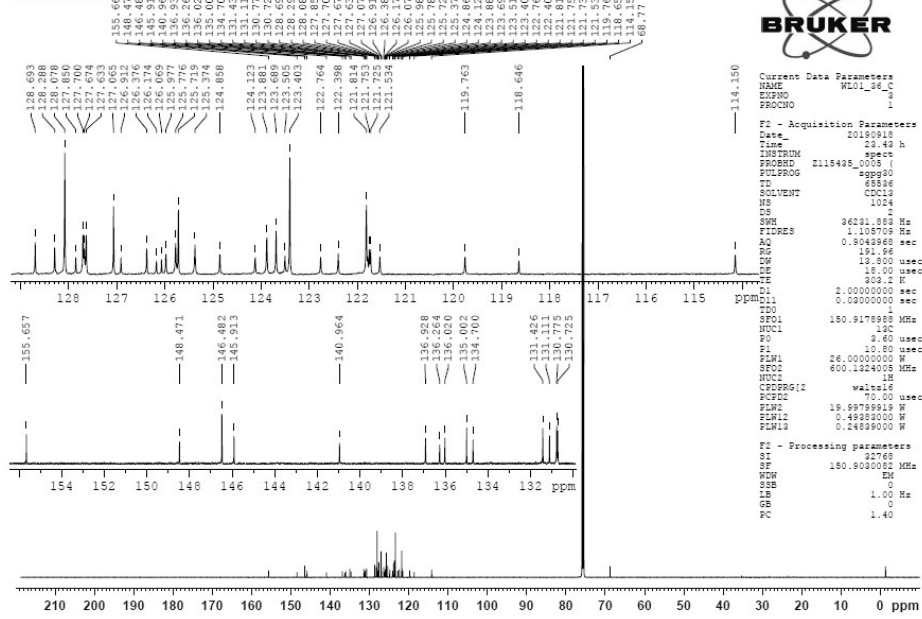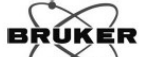

**Current Data Parameters**  
 Name: WL01\_36\_C  
 EXPNO: 1  
 PROCNO: 1  
 F2 - Acquisition Parameters  
 Date\_: 20190830  
 Time: 23:45 h  
 INSTRUM: spect  
 PROBRD: Z115495\_0005 ( )  
 PULPROG: zgpg30  
 TD: 65536  
 SFO1: 600.1327058 MHz  
 SFO2: 150.9178998 MHz  
 FIDRES: 26281.983 Hz  
 RES: 1.105708 Hz  
 AQ: 0.8168963 sec  
 RG: 191.56  
 DQ: 18.000 usec  
 DE: 18.000 usec  
 TEMPERATURE: 303.2 K  
 P1: 2.00000000 sec  
 SFO1: 150.9178998 MHz  
 SFO2: 300.0663529 MHz  
 F1: 3.07 usec  
 F2: 11.00 usec  
 SFO1: 600.1327058 MHz  
 SFO2: 150.9178998 MHz  
 FIDRES: 15.99799919 W  
 RES: 0.49282008 Hz  
 SFO1: 0.24899000 W  
 F2 - Processing parameters  
 SF: 150.9303020 MHz  
 WHW: EM  
 SSB: 0  
 GAMMA: 1.00 Hz  
 PC: 1.40

## Characterization data

**Table S1** Selected bond lengths (Å) and dihedral angles (°) for  $S_0$  and  $S_1$  optimized geometries of enol form computed at CAM-B3LYP/6-31 G(d,p) level.

| Compound | State | Distance (Å) |       |       | Torsion<br>OC1C2C3N |
|----------|-------|--------------|-------|-------|---------------------|
|          |       | O-H          | N-H   | O-N   |                     |
| mTAHPI   | $S_0$ | 0.999        | 1.656 | 2.609 | 10                  |
|          | $S_1$ | 0.999        | 1.638 | 2.823 | 2                   |
| pTAHPI   | $S_0$ | 0.999        | 1.652 | 2.556 | 6                   |
|          | $S_1$ | 0.995        | 1.653 | 2.553 | 7                   |

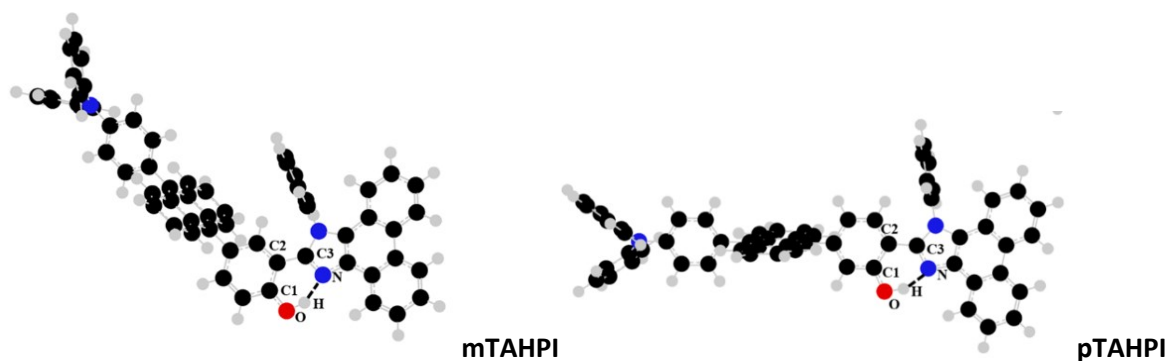

Optimized geometries of target compounds in gas phase computed at CAM-B3LYP/6-31G(d,p) level.

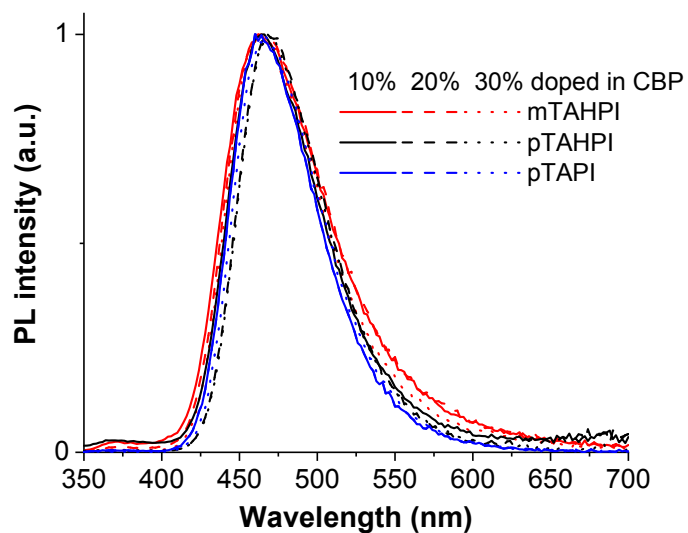

**Fig. S2** PL spectra of mTAHPI, pTAHPI and pTAPI 10-30 wt% doped in CBP films.

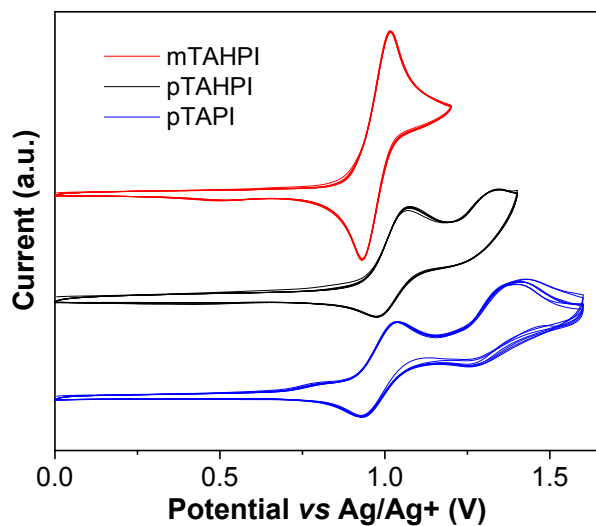

**Fig. S3** Repeated cyclic voltammograms (7 scans) of **mTAHPI**, **pTAHPI** and **pTAPI** measured in  $\text{CH}_2\text{Cl}_2$  containing  $n\text{-Bu}_4\text{NPF}_6$  as a supporting electrolyte at a scan rate of  $50 \text{ mV s}^{-1}$  under Ar flow.

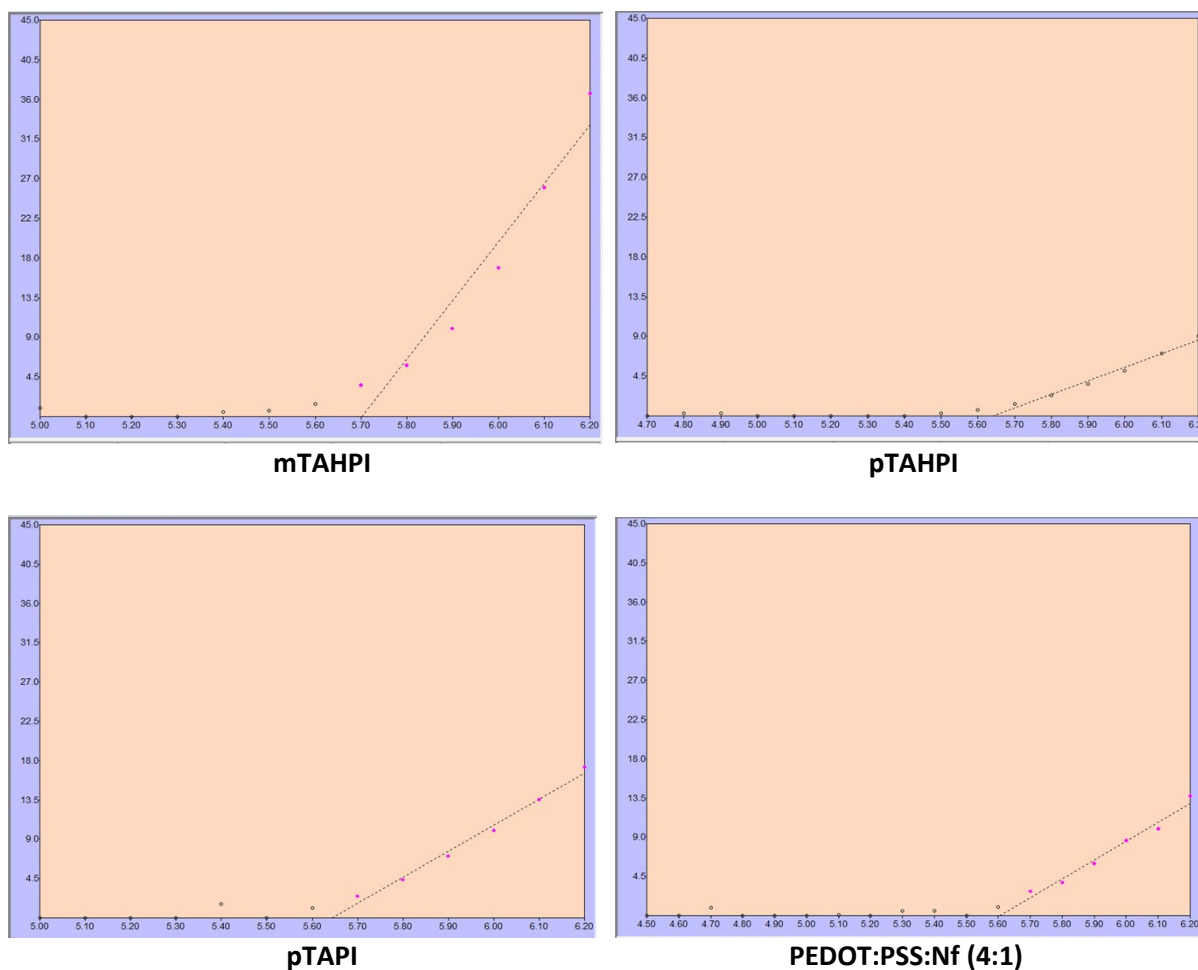

**Fig. S4** Photoemission yield spectroscopy in air spectra (AC-2 plots) of **mTAHPI**, **pTAHPI**, **pTAPI** and **PEDOT:PSS:Nf (4:1)** thin films.

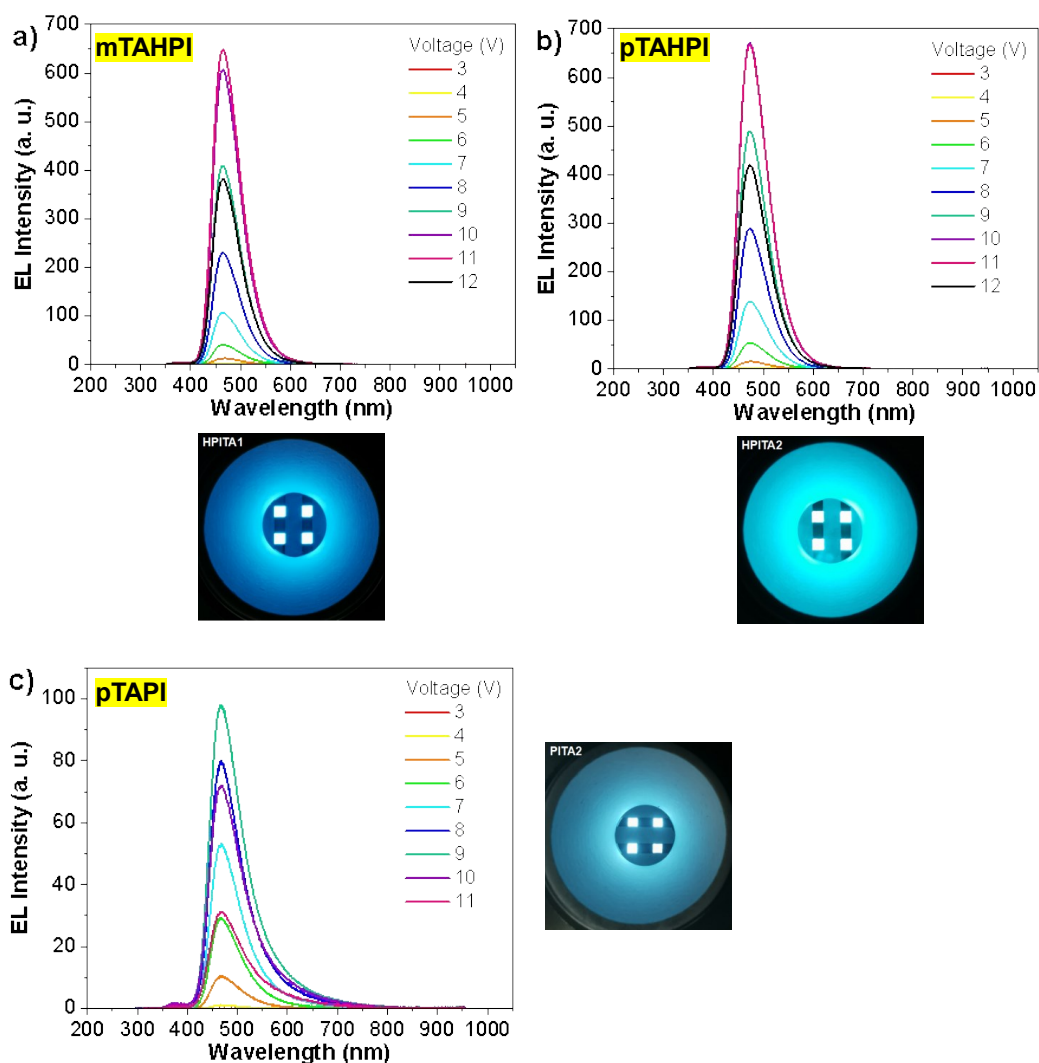

**Fig. S4** EL spectra of the devices under different applied voltages (insert: images of blue OLEDs).

**Table S2** Detailed data of **mTAHPI**, **pTAHPI** and **pTAPI** for fitting photophysical results in different solvents based on Lippert-Mataga equation.

For **mTAHPI**:

| Solvent       | $\epsilon$ | $n$    | $f(\epsilon, n)$ | $\lambda_{\text{abs}}$<br>(nm) | $\lambda_{\text{pl}}$<br>(nm) | $U_a$<br>( $\text{cm}^{-1}$ ) | $U_f$<br>( $\text{cm}^{-1}$ ) | $U_a - U_f$<br>( $\text{cm}^{-1}$ ) |
|---------------|------------|--------|------------------|--------------------------------|-------------------------------|-------------------------------|-------------------------------|-------------------------------------|
| Hexane        | 1.9        | 1.3749 | 0.00126          | 366                            | 439                           | 27322.40437                   | 22779.04328                   | 4543.36109                          |
| Toluene       | 2.38       | 1.497  | 0.01321          | 368                            | 452                           | 27173.91304                   | 22123.89381                   | 5050.01924                          |
| 1,4 Dioxane   | 2.25       | 1.422  | 0.02465          | 366                            | 456                           | 27322.40437                   | 21929.82456                   | 5392.57981                          |
| Chlorobenzene | 5.62       | 1.5248 | 0.14294          | 368                            | 465                           | 27173.91304                   | 21505.37634                   | 5668.5367                           |
| Chloroform    | 4.81       | 1.4458 | 0.14829          | 366                            | 470                           | 27322.40437                   | 21276.59574                   | 6045.80863                          |
| Ethyl Ether   | 4.33       | 1.3524 | 0.16675          | 365                            | 452                           | 27397.26027                   | 22123.89381                   | 5273.36647                          |
| Ethyl Acetate | 6.02       | 1.372  | 0.19978          | 366                            | 468                           | 27322.40437                   | 21367.52137                   | 5954.883                            |
| THF           | 7.58       | 1.407  | 0.20964          | 366                            | 470                           | 27322.40437                   | 21276.59574                   | 6045.80863                          |
| DCM           | 8.93       | 1.424  | 0.21717          | 366                            | 490                           | 27322.40437                   | 20408.16327                   | 6914.24111                          |
| DMF           | 36.7       | 1.4305 | 0.27438          | 366                            | 521                           | 27322.40437                   | 19193.85797                   | 8128.54641                          |
| Acetone       | 20.7       | 1.3587 | 0.28431          | 365                            | 498                           | 27397.26027                   | 20080.32129                   | 7316.93899                          |
| Acetonitrile  | 37.5       | 1.3441 | 0.30542          | 365                            | 528                           | 27397.26027                   | 18939.39394                   | 8457.86633                          |

For **pTAHPI**:

| Solvent       | $\epsilon$ | $n$    | $f(\epsilon, n)$ | $\lambda_{\text{abs}}$<br>(nm) | $\lambda_{\text{pl}}$<br>(nm) | $\nu_a$<br>( $\text{cm}^{-1}$ ) | $\nu_f$<br>( $\text{cm}^{-1}$ ) | $\nu_a - \nu_f$<br>( $\text{cm}^{-1}$ ) |
|---------------|------------|--------|------------------|--------------------------------|-------------------------------|---------------------------------|---------------------------------|-----------------------------------------|
| Hexane        | 1.9        | 1.3749 | 0.00126          | 374                            | 446                           | 26737.96791                     | 22421.52466                     | 4316.44325                              |
| Toluene       | 2.38       | 1.497  | 0.01321          | 377                            | 460                           | 26525.19894                     | 21739.13043                     | 4786.0685                               |
| 1,4 Dioxane   | 2.25       | 1.422  | 0.02465          | 376                            | 462                           | 26595.74468                     | 21645.02165                     | 4950.72304                              |
| Chlorobenzene | 5.62       | 1.5248 | 0.14294          | 376                            | 476                           | 26595.74468                     | 21008.40336                     | 5587.34132                              |
| Chloroform    | 4.81       | 1.4458 | 0.14829          | 376                            | 477                           | 26595.74468                     | 20964.36059                     | 5631.38409                              |
| Ethyl Ether   | 4.33       | 1.3524 | 0.16675          | 373                            | 459                           | 26809.65147                     | 21786.49237                     | 5023.1591                               |
| Ethyl Acetate | 6.02       | 1.3724 | 0.19964          | 374                            | 476                           | 26737.96791                     | 21008.40336                     | 5729.56455                              |
| THF           | 7.58       | 1.4072 | 0.20957          | 376                            | 478                           | 26595.74468                     | 20920.50209                     | 5675.24259                              |
| DCM           | 8.93       | 1.424  | 0.21717          | 375                            | 496                           | 26666.66667                     | 20161.29032                     | 6505.37634                              |
| DMF           | 36.7       | 1.4305 | 0.27438          | 376                            | 536                           | 26595.74468                     | 18656.71642                     | 7939.02826                              |
| Acetone       | 20.7       | 1.3587 | 0.28431          | 374                            | 515                           | 26737.96791                     | 19417.47573                     | 7320.49219                              |
| Acetone       | 37.5       | 1.3441 | 0.30542          | 374                            | 541                           | 26737.96791                     | 18484.28835                     | 8253.67956                              |

For **pTAPI**:

| Solvent       | $\epsilon$ | $n$    | $f(\epsilon, n)$ | $\lambda_{\text{abs}}$<br>(nm) | $\lambda_{\text{pl}}$<br>(nm) | $\nu_a$<br>( $\text{cm}^{-1}$ ) | $\nu_f$<br>( $\text{cm}^{-1}$ ) | $\nu_a - \nu_f$<br>( $\text{cm}^{-1}$ ) |
|---------------|------------|--------|------------------|--------------------------------|-------------------------------|---------------------------------|---------------------------------|-----------------------------------------|
| Hexane        | 1.9        | 1.3749 | 0.00126          | 374                            | 441                           | 26737.96791                     | 22675.73696                     | 4062.23095                              |
| Toluene       | 2.38       | 1.497  | 0.01321          | 378                            | 458                           | 26455.02646                     | 21834.06114                     | 4620.96532                              |
| 1,4 Dioxane   | 2.25       | 1.422  | 0.02465          | 376                            | 464                           | 26595.74468                     | 21551.72414                     | 5044.02054                              |
| Chlorobenzene | 5.62       | 1.5248 | 0.14294          | 378                            | 474                           | 26455.02646                     | 21097.04641                     | 5357.98004                              |
| Chloroform    | 4.81       | 1.4458 | 0.14829          | 378                            | 478                           | 26455.02646                     | 20920.50209                     | 5534.52436                              |
| Ethyl Ether   | 4.33       | 1.3524 | 0.16675          | 374                            | 457                           | 26737.96791                     | 21881.83807                     | 4856.12984                              |
| Ethyl Acetate | 6.02       | 1.372  | 0.19978          | 374                            | 478                           | 26737.96791                     | 20920.50209                     | 5817.46582                              |
| THF           | 7.58       | 1.407  | 0.20964          | 376                            | 480                           | 26595.74468                     | 20833.33333                     | 5762.41135                              |
| DCM           | 8.93       | 1.424  | 0.21717          | 377                            | 500                           | 26525.19894                     | 20000                           | 6525.19894                              |
| DMF           | 36.7       | 1.4305 | 0.27438          | 377                            | 534                           | 26525.19894                     | 18726.59176                     | 7798.60718                              |
| Acetone       | 20.7       | 1.3587 | 0.28431          | 375                            | 513                           | 26666.66667                     | 19493.17739                     | 7173.48928                              |
| Acetone       | 37.5       | 1.3441 | 0.30542          | 374                            | 545                           | 26737.96791                     | 18348.62385                     | 8389.34406                              |

The dipole moment of ground state  $\mu_g$  can be estimated by DFT calculation, and the the dipole moment of excited state are determined from the slope of linear fitted Stokes' shift ( $\nu_a - \nu_f$ ) against orientation polarizability  $f(\epsilon, n)$  in different solvents according to Lippert-Mataga equation.<sup>1</sup>

$$hc(\nu_a - \nu_f) = hc(\nu_a^0 - \nu_f^0) + \frac{2(\mu_e - \mu_g)^2}{a_0^3} f(\epsilon, n),$$

$$f(\epsilon, n) = \frac{\epsilon - 1}{2\epsilon + 1} + \frac{n^2 - 1}{2n^2 + 1},$$

Among which  $\epsilon$  and  $n$  are dielectric constant and refractive index of solvent respectively, and  $a_0$  is the solvent cavity radius

$$a_0 = \left( \frac{3M}{4N\pi d} \right)^{1/3},$$

where  $N$  is Avogadro number,  $M$  is molecular weight, and  $d$  is density. Two-region trends found in **mTAHPI**, **pTAHPI** and **pTAPI** are steady slopes of 4774, 5099, and 4854 for low-polar solvents and sharp slopes of 21838, 23295, and 23477 for high-polar solvents.

<sup>1</sup>C. Feng, J. Li, X. Han, X. He, L. Liu, X. Li, X. Sun, P. Lu and Y. Ma, *Faraday Discuss.* 2017, **196**, 163-176.

**Table S3** Crystallographic data for **mTAHPI**.

| Parameters                      | mTAHPI                                           |
|---------------------------------|--------------------------------------------------|
| Formula                         | C <sub>59</sub> H <sub>39</sub> N <sub>3</sub> O |
| Formula Weight                  | 805.93                                           |
| Crystal System                  | triclinic                                        |
| Space group                     | P-1                                              |
| a [Å]                           | 9.3925(5)                                        |
| b [Å]                           | 13.4585(7)                                       |
| c [Å]                           | 18.2373(9)                                       |
| α [°]                           | 93.538(2)                                        |
| β [°]                           | 95.122(2)                                        |
| γ [°]                           | 93.595(2)                                        |
| V [Å <sup>3</sup> ]             | 2286.4(2)                                        |
| Z                               | 2                                                |
| D(calc) [g/cm <sup>3</sup> ]    | 1.171                                            |
| μ [mm <sup>-1</sup> ]           | 0.069                                            |
| F (000)                         | 844.0                                            |
| Crystal Size [mm <sup>3</sup> ] | 0.25 × 0.22 × 0.03                               |
| Temperature [K]                 | 195                                              |
| Radiation [Å]                   | MoKα (λ = 0.71073)                               |
| θ range [°]                     | 4.364 to 52.04                                   |
| Total no. of reflections        | 69877                                            |
| Uniq. Data                      | 9028                                             |
| R <sub>int</sub>                | 0.0624                                           |
| Parameters                      | 597                                              |
| R                               | 0.0448 [I>=2σ(I)],<br>0.0652 [all data]          |
| wR2                             | 0.1053 [I>=2σ(I)],<br>0.1142 [all data]          |
| Goodness to fit                 | 1.024                                            |
| CCDC deposition number          | 2007054                                          |

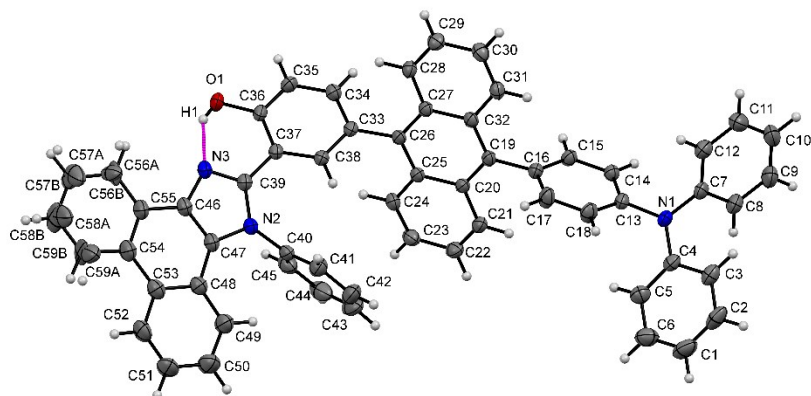

Molecular structure of **mTAHPI** with 50% probability at 195 K. Intramolecular hydrogen bonding of O1—H1···N3 is highlighted.
